# Supplementary material
Source: ML conference proceedings conference paper supplement (https://openreview.net/forum?id=fqpR9FRso9)
Supplement: supplementary_material [file Supplementary Material.pdf › Supplementary Material.pdf]

752 **E Supplementary Materials**

753 This section provides detailed examples of our tasks. Choices highlighted in yellow represent the  
754 ground truth. In the responses, correct answers are highlighted in green, while incorrect ones are  
755 highlighted in red.

**Example for Artifact Recognition**

**Question:** Is there an artifact present in the image?

**Options:**  
A. Yes, there is an artifact present in the image.  
B. No, the image appears normal without any artifacts.



**Claude Response:**  
A. Yes, there is an artifact present in the image.

Figure 13: Example for Artifact Recognition

**Example for Noise Recognition**

**Question:** Here are two medical images. One of them has added noise. Which one is the noised image?

**Options:**  
A. Left  
B. Right

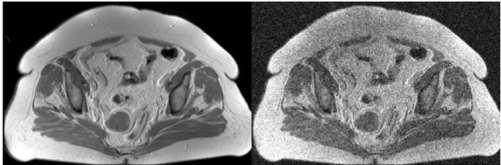

**Claude Response:**  
B. Right

Figure 14: Example for Noise Recognition

### Example for Modality Recognition

**Question:** What type of medical imaging is this image?

**Options:**

- A. Radiography
- B. Ultrasound
- C. Magnetic Resonance Imaging
- D. Pathology

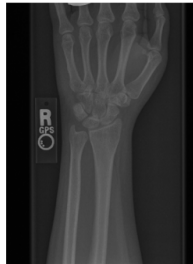

**Claude Response:**

- A. Radiography

Figure 15: Example for Modality Recognition

### Example for View Recognition

**Question:** What is the view position of this CT image?

**Options:**

- A. sagittal
- B. axial
- C. coronal

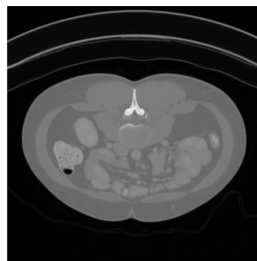

**Claude Response:**

- B. axial

Figure 16: Example for View Recognition

### Example for Body Part Recognition

**Question:** What body part is shown in this MRI?

**Options:**

- A. Head
- B. Chest
- C. Abdomen
- D. Pelvis

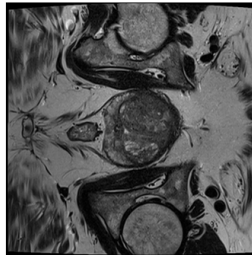

**Claude Response:**

D. Pelvis

Figure 17: Example for Body Part Recognition

### Example for Magnification Recognition

**Question:** Based on the field of view and visible detail, is this image captured under low-power ( $\leq 10\times$ ) or high-power ( $\geq 20\times$ ) magnification?

**Options:**

- A. Low-power field (e.g., overview of tissue,  $\leq 10\times$ )
- B. High-power field (e.g., individual cells and nuclei,  $\geq 20\times$ )

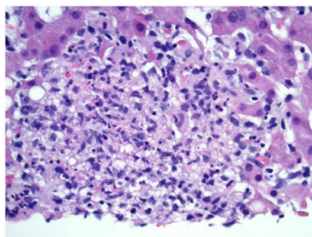

**Claude Response:**

B. High-power field (e.g., individual cells and nuclei,  $\geq 20\times$ )

Figure 18: Example for Magnification Recognition

### Example for Stain Recognition

**Question:** What is the type of staining used in this image?

**Options:**

- A. H&E
- B. Masson's Trichrome
- C. PAS
- D. Wright's stain

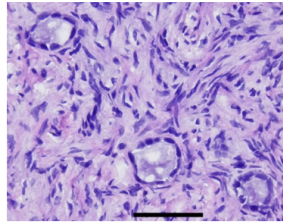

**Claude Response:**

A. H&E

Figure 19: Example for Stain Recognition

### Example for Imaging tech. Recognition

**Question:** Which MRI sub-modality does the image below correspond to?

**Options:**

- A. T1
- B. T2
- C. Flair
- B. dwi

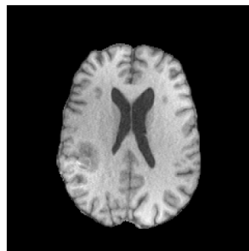

**Claude Response:**

A. T1

Figure 20: Example for Imaging Technique Recognition

### Example for Organ/Tissue Recognition

**Question:** : What organ is highlighted in this image?

**Options:**

- A. Right lung
- B. Gallbladder
- C. Pulmonary artery
- D. Left kidney

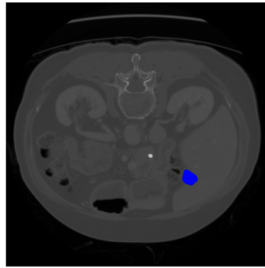

**Claude Response:**

D. Left kidney

Figure 21: Example for Organ Recognition

### Example for Organ/Tissue Recognition

**Question:** What is the organ or tissue in this image?

**Options:**

- A. Liver
- B. Adipose tissue
- C. Skeletal muscle
- D. Kidney

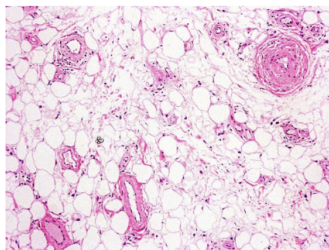

**Claude Response:**

D. Left kidney

Figure 22: Example for Tissue Recognition

### Example for Organ Location

**Question:** Which color represents aorta in this image?

**Options:**

- A. Red
- B. Green
- C. Blue
- D. Yellow

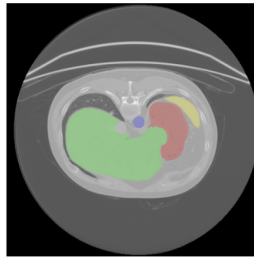

**Claude Response:**

A. Red

Figure 23: Example for Organ Location

### Example for Organ Erasure Recognition

**Question:** Which anatomical structure has been removed or edited in this AI-edited X-ray image?

**Options:**

- A. Left lung
- B. Right lung
- C. Heart
- D. First rib

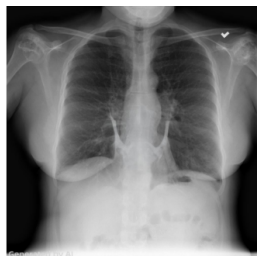

**Claude Response:**

C. Heart

Figure 24: Example for Organ Erasure Recognition

### Example for Lesion Recognition

**Question:** What abnormality is inside the red box in this image?

**Options:**

- A. Atelectasis
- B. Pneumothorax
- C. Cardiomegaly
- D. Fibrosis

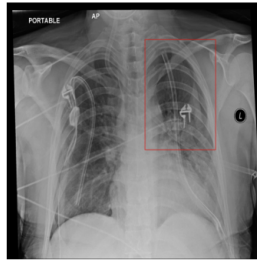

**Claude Response:**

- B. Pneumothorax

Figure 25: Example for Lesion Recognition

### Example for Lesion Erasure Recognition

**Question:** What abnormality is inside the red box in this image?

**Options:**

- A. Lung nodule
- B. Lung cancer
- C. Pleural effusion
- D. Lung infections

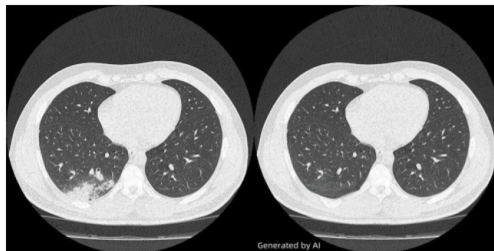

**Claude Response:**

- C. Pleural effusion

Figure 26: Example for Lesion Erasure Recognition

### Example for Morphology Description

**Question:** Which of the following best describes the cellular morphology observed in the slide?

**Options:**

- A. Spindle cells arranged in tightly packed, parallel fascicles
- B. Spindle cells aligned in a whorled, storiform pattern
- C. Spindle cells loosely distributed in a disorganized matrix
- D. Spindle cells forming solid sheets without architectural arrangement

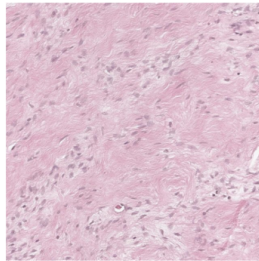

**Claude Response:**

C. Spindle cells loosely distributed in a disorganized matrix

Figure 27: Example for Morphology Description

### Example for Diagnosis

**Question:** What is the most likely histopathological diagnosis for this slide?

**Options:**

- A. Interface hepatitis with lymphocytic infiltration
- B. Presence of a leukocyte within a hepatocyte
- C. Endothelial lifting in a portal venule
- D. An eosinophilic leukocyte in the sinusoidal space

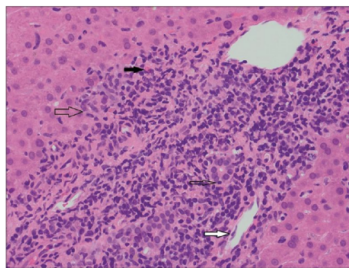

**Claude Response:**

A. Interface hepatitis with lymphocytic infiltration

Figure 28: Example for Diagnosis
